# Supplementary material for: Ultrafast Coulomb explosion of a diiodomethane molecule induced by an X-ray free-electron laser pulse
Source: Royal Society of Chemistry journal article supplement (doi:10.1039/c7cp01669g), 2017-01-01
Supplement: c7cp01669g1.pdf [file c7cp01669g1.pdf]

## Electronic Supplementary Information

# Ultrafast Coulomb Explosion of the Diiodomethane Molecule Induced by an X-ray Free-electron Laser Pulse

Tsukasa Takanashi,<sup>a</sup> Kosuke Nakamura,<sup>b</sup> Edwin Kukk,<sup>c</sup> Koji Motomura,<sup>a</sup>  
Hironobu Fukuzawa,<sup>a,d</sup> Kiyonobu Nagaya,<sup>d,e</sup> Shin-ichi Wada,<sup>d,f</sup> Yoshiaki Kumagai,<sup>a</sup>  
Denys Iablonskyi,<sup>a</sup> Yuta Ito,<sup>a</sup> Yuta Sakakibara,<sup>a</sup> Daehyun You,<sup>a</sup>  
Toshiyuki Nishiyama,<sup>e</sup> Kazuki Asa,<sup>e</sup> Yuhiro Sato,<sup>e</sup> Takayuki Umemoto,<sup>f</sup>  
Kango Kariyazono,<sup>f</sup> Kohei Ochiai,<sup>b</sup> Manabu Kanno,<sup>b</sup> Kaoru Yamazaki,<sup>g,h</sup>  
Kuno Kooser,<sup>c,i</sup> Christophe Nicolas,<sup>j</sup> Catalin Miron,<sup>j,k</sup> Theodor Asavei,<sup>k</sup>  
Liviu Neagu,<sup>k</sup> Markus Schöffler,<sup>l</sup> Gregor Kastirke,<sup>l</sup> Xiao-Jing Liu,<sup>m</sup>  
Artem Rudenko,<sup>n</sup> Shigeki Owada,<sup>d</sup> Tetsuo Katayama,<sup>o</sup> Tadashi Togashi,<sup>o</sup>  
Kensuke Tono,<sup>o</sup> Makina Yabashi,<sup>d</sup> Hirohiko Kono<sup>b</sup> and Kiyoshi Ueda<sup>\*a,d</sup>

<sup>a</sup> Institute of Multidisciplinary Research for Advanced Materials, Tohoku University, Sendai 980-8577, Japan.

<sup>b</sup> Department of Chemistry, Graduate School of Science, Tohoku University, Sendai 980-8578, Japan.

<sup>c</sup> Department of Physics and Astronomy, University of Turku, Turku FI-20014, Finland.

<sup>d</sup> RIKEN SPring-8 Center, Sayo, Hyogo 679-5148, Japan.

<sup>e</sup> Department of Physics, Graduate School of Science, Kyoto University, Kyoto 606-8502, Japan.

<sup>f</sup> Department of Physical Science, Hiroshima University, Higashi-Hiroshima 739-8526, Japan.

<sup>g</sup> Department of Chemistry, Faculty of Science, Hokkaido University, Sapporo 060-0810, Japan.

<sup>h</sup> Institute for Materials Research, Tohoku University, Sendai 980-8577, Japan.

<sup>i</sup> Institute of Physics, University of Tartu, EST-50411 Tartu, Estonia.

<sup>j</sup> Synchrotron SOLEIL, L'Orme des Merisiers, Saint-Aubin, BP 48, FR-91192 Gif-sur-Yvette Cedex, France.

<sup>k</sup> Extreme Light Infrastructure - Nuclear Physics (ELI-NP), "Horia Hulubei" National Institute for Physics and Nuclear Engineering, 30 Reactorului Street, RO-077125 Măgurele, Jud. Ilfov, Romania.

<sup>l</sup> Institut für Kernphysik, J. W. Goethe Universität, Max-von-Laue-Str. 1, Frankfurt D-60438, Germany.

<sup>m</sup> School of Physics and Nuclear Energy Engineering, Beihang University, Beijing 100191, People's Republic of China.

<sup>n</sup> J. R. Macdonald Laboratory, Department of Physics, Kansas State University, Manhattan, Kansas 66506, USA.

<sup>o</sup> Japan Synchrotron Radiation Research Institute (JASRI), Sayo, Hyogo 679-5198, Japan.

\*Corresponding author: Fax: +81-22-217-5380; Tel: +81-22-217-5381; E-mail: ueda@tagen.tohoku.ac.jp

## 1 Electric field effects of the XFEL pulse on electronic and nuclear dynamics

An effect of the XFEL electric field on the motion of nuclei to be explored is the time-dependent potential distortion induced by the XFEL electric field. The leading term of this additional force on the  $j$ th nucleus can be expressed by the optical cycle average term of the Raman type of interaction<sup>S1,S2</sup>, such as  $\langle f(t) \cdot (\partial \alpha / \partial R_j) \cdot f(t) \rangle / 4$ , where  $f(t)$  is the envelope vector of the XFEL electric field,  $\alpha$  is the polarizability tensor, and  $R_j$  is a Cartesian coordinate of the  $j$ th nucleus. This type of field-induced potential distortion accelerates the bond dissociation associated with H atoms or protons, because those species can move even in the short duration  $\sim 10$  fs of the XFEL pulse. In the present SCC-DFTB approach, the effect of field-induced potential distortion is considered to be virtually included in the process of adding kinetic energy.

For the photon energy of 5.5 keV and the field strength of  $1.5 \times 10^{12}$  V/m, the ponderomotive radius of this strong XFEL electric field is only  $3.8 \times 10^{-5}$  Å and the ponderomotive energy is  $1.5 \times 10^{-3}$  eV. The effects of rescattering on the electronic and nuclear motion should be negligible.

## 2 On the accuracy of the SCC-DFTB method

We performed electronic structure calculations for potential surfaces of CH<sub>2</sub>I<sub>2</sub> and CH<sub>3</sub>I. The dissociation energy for C-I bond elongation of CH<sub>3</sub>I is 3.7 eV for SCC-DFTB and 4.0 eV for B3LYP/6-311G(d,p); that for C-H bond elongation is 6.1 eV for SCC-DFTB and 6.9 eV for B3LYP/6-311G(d,p). The dissociation energy for C-I stretching of CH<sub>2</sub>I<sub>2</sub> is 3.3 eV for SCC-DFTB and 3.6 eV for B3LYP/6-311G(d,p); that for C-H stretching is 5.7 eV for SCC-DFTB and 6.4 eV for B3LYP/6-311G(d,p). We obtained the same level of accuracy for monocation potential surfaces. We also compared the fragment charges calculated by the SCC-DFTB and B3LYP/6-311G(d,p). Both methods provide almost the same fragment charges; e.g. for CH<sub>3</sub>I at the electronic temperature  $T_e \approx 0$ , the fragment charges of the iodine and carbon ions for  $Q_{\max} = 11$

was +5 and +3, respectively.

In the present SCC-DFTB/MD, no ionization energies are directly used; we merely switch the charge state of a molecule to the higher one according to the charge build-up curve eqn (1). We however carried out calculations on trial to confirm the accuracy of the SCC-DFTB method: The  $\Delta$ SCF first ionization energy of  $\text{CH}_3\text{I}$  is 9.9 eV for SCC-DFTB and 9.8 eV for B3LYP/6-311G(d,p) (The experimental IP = 9.52 eV<sup>S3</sup>); The corresponding value of  $\text{CH}_2\text{I}_2$  is 9.3 eV for SCC-DFTB and 9.4 eV for B3LYP/6-311G(d,p).

### 3 Optimal value of the charge build-up time $\tau$

We examined how the calculated kinetic energies of fragment ions depend on the charge build-up constant  $\tau$ . With increasing (decreasing)  $\tau$ , the kinetic energy distribution of each fragment ion is shifted toward the lower (higher) energy side. For example, in the case of  $\text{CH}_2\text{I}_2$ , the average kinetic energy of iodine ions for  $Q_{\text{fin}} = 9$  is lower by 0.9 eV for  $\tau = 15$  fs than for  $\tau = 10$  fs; that of carbon ions is lower by 5.0 eV. For  $\tau = 5$  fs, the average kinetic energy of iodine ions for  $Q_{\text{fin}} = 9$  is higher by 1.6 eV and that of carbon ions is higher by 6.1 eV, compared to the case of  $\tau = 10$  fs. Since the kinetic energy distributions for iodine and carbon ions both shift to the same energy side irrespective of whether  $\tau$  gets longer or shorter, more satisfactory results cannot be obtained by changing the value of  $\tau$ . To obtain better agreement with the experimental results (See Figs. 5 and 6),  $\tau > 10$  fs is desirable for carbon ions while  $\tau < 10$  fs is desirable for iodine ions. We therefore determine the optimal  $\tau$  in terms of the kinetic energy sum distributions of carbon and iodine ions. The deviations from the experimental results are then minimized around  $\tau = 10$  fs for both  $\text{CH}_2\text{I}_2$  and  $\text{CH}_3\text{I}$ , as shown in Fig. S1.

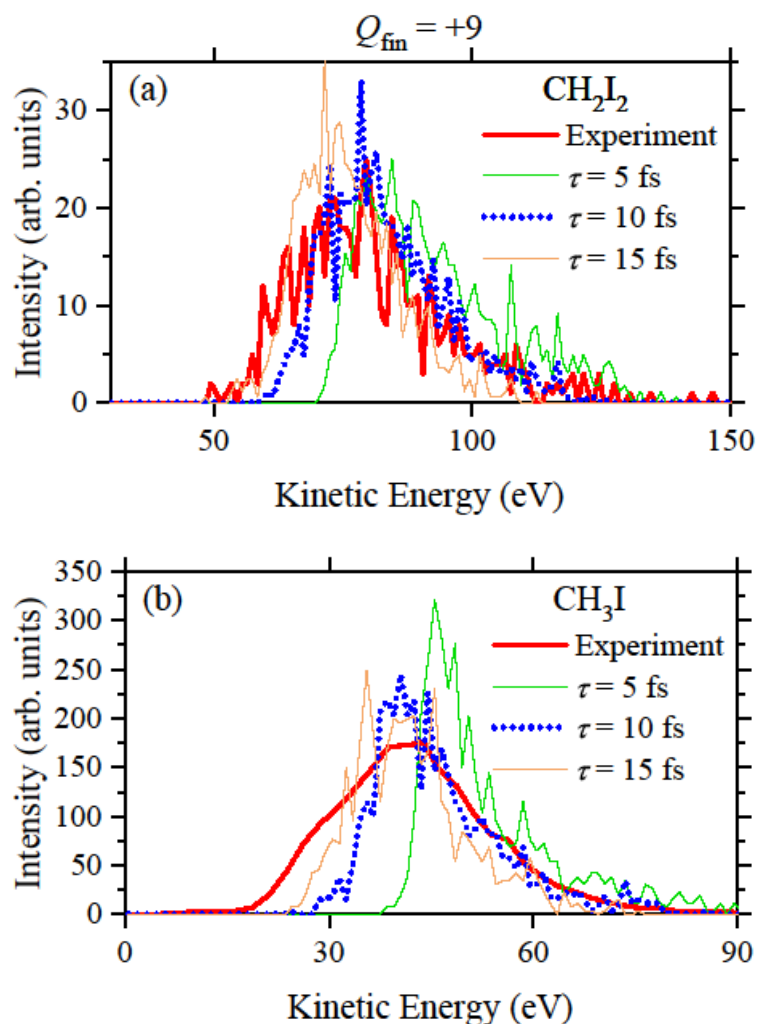

**Fig. S1** Charge build-up time  $\tau$  dependence of kinetic energy sum distributions of carbon and iodine ions for  $Q_{\text{max}} = 9$ : (a)  $\text{CH}_2\text{I}_2$ ; (b)  $\text{CH}_3\text{I}$ .

#### 4 Total amount of injected kinetic energy in the SCC-DFTB approach

We analyzed how much vibrational energy is injected by the time when the charge of the molecule reaches the theoretical final charge  $Q_{\text{max}}$ . As shown in Fig. S2, the average injection energy  $\Delta E$ , defined by eqn (3), increases almost linearly with  $Q_{\text{max}}$ .  $\Delta E$  increases by  $\sim 4$  eV per unit increase in  $Q_{\text{max}}$ ; for  $\text{CH}_3\text{I}$ , it is 21 eV at  $Q_{\text{max}} = 5$  and 57 eV at  $Q_{\text{max}} = 14$ ; for  $\text{CH}_2\text{I}_2$ , it is 23 eV at  $Q_{\text{max}} = 5$  and 63 eV at  $Q_{\text{max}} = 14$ . The average injection energy per unit charge increase however gradually

diminishes as  $Q_{\max}$  increases, as shown in Fig. S2, because more bonds exceed the critical distance for energy injection. For the same  $Q_{\max}$ ,  $\Delta E$  was a little larger for  $\text{CH}_2\text{I}_2$  than for  $\text{CH}_3\text{I}$  because  $\text{CH}_2\text{I}_2$  has two long lasting C-I bonds.

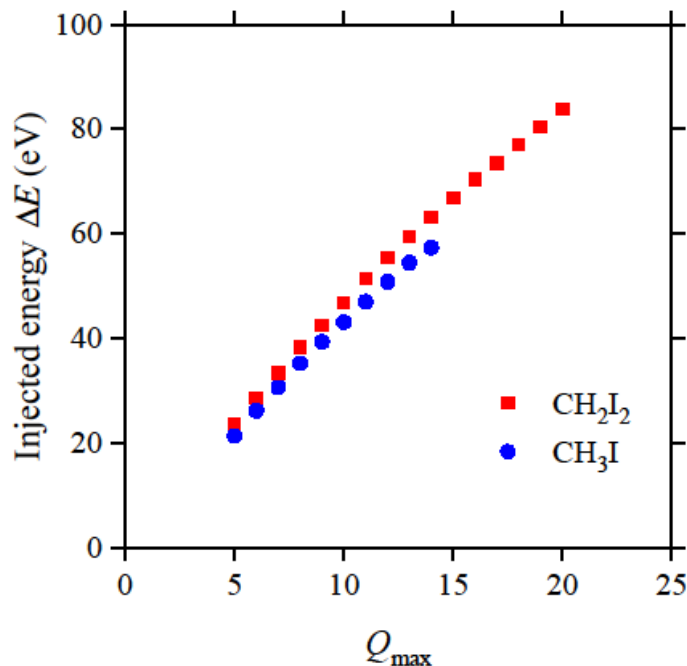

**Fig. S2** Injected energy  $\Delta E$  as a function of the final charge  $Q_{\max}$ .

## 5 Role of the addition of repulsive kinetic energy

The ground state potential surfaces for highly charged  $\text{CH}_2\text{I}_2$  or  $\text{CH}_3\text{I}$  are repulsive. The nuclei gain extra kinetic energies on those repulsive potentials. Assuming that the ground and excited state potentials are not perfectly parallel to one another and there are chances of nonadiabatic transitions, we further added repulsive momenta for high charge states of  $Q_{\text{tot}}(t) \geq 8$ , where all atoms have considerable positive charges ( $\geq 1$ ). To examine the role of this extra addition of repulsive kinetic energy for  $Q_{\text{tot}}(t) \geq 8$ , we compared the two cases with and without adding artificial kinetic energies for the final charges  $Q_{\max} \geq 8$ . For both molecules, the kinetic energy distributions of heavy iodine atoms in these two cases are nearly equal to each other; they have

nearly the same shape and average kinetic energy. For carbon atoms, the kinetic energy distributions depend on the presence or absence of added repulsive kinetic energies for  $Q_{\text{tot}}(t) \geq 8$ . At  $Q_{\text{max}} = 9$ , the addition of extra kinetic energy for  $Q_{\text{tot}}(t) \geq 8$  change the kinetic energy distributions only slightly. The kinetic energy distribution of carbon ions for  $\text{CH}_2\text{I}_2$  is sifted by 3.5 eV with adding extra kinetic energy when  $Q_{\text{tot}}(t) \geq 8$ ; that for  $\text{CH}_3\text{I}$  is shifted by only 0.5 eV. In the case of  $Q_{\text{max}} = 9$ , most of the bonds exceed the critical distance for kinetic energy injection when  $Q_{\text{tot}}(t)$  reaches 8. The difference between the two cases becomes more distinct as  $Q_{\text{max}}$  increases. At  $Q_{\text{max}} = 14$ , the kinetic energy distribution of carbon atoms for  $\text{CH}_2\text{I}_2$  is sifted by 6.8 eV toward the higher energy side with adding extra kinetic energy when  $Q_{\text{tot}}(t) \geq 8$ ; that for  $\text{CH}_3\text{I}$  is shifted by 1.6 eV. The energy shift is more pronounced for  $\text{CH}_2\text{I}_2$  than for  $\text{CH}_3\text{I}$  because  $\text{CH}_2\text{I}_2$  has two heavy iodine atoms and expands slowly. These energy shifts are relatively small, since the average kinetic energy of carbon ions is beyond 100 eV: The addition of repulsive kinetic energies for  $Q_{\text{tot}}(t) \geq 8$  is not crucial at present. We however noted that the simulated kinetic energy distribution of carbon atoms becomes closer to the experimental one for  $\text{CH}_3\text{I}$  by the addition of extra kinetic energy for  $Q_{\text{tot}}(t) \geq 8$  and becomes worse for  $\text{CH}_2\text{I}_2$ . To obtain consistent agreement in kinetic energy distributions, it is necessary to scrutinize the physics behind the kinetic energy injection based on eqn (4) from the viewpoint of first-principles simulations.

## References

- S1 Y. Sato, H. Kono, S. Koseki and Y. Fujimura, *J. Am. Chem. Soc.* 2003, **125**, 8019-8031.
- S2 N. Niitsu, M. Kikuchi, H. Ikeda, K. Yamazaki, M. Kanno, H. Kono, K. Mitsuke, M. Toda and K. Nakai, *J. Chem. Phys.* 2012, **136**, 164304.
- S3 “*NIST Chemistry WebBook*”, *NIST Standard Reference Database Number 69*, ed. P. J. Linstrom and W. G. Mallard, National Institute of Standards and Technology, Gaithersburg MD, 20899, <http://webbook.nist.gov>.
